# Supplementary material for: A slight bluish-white fluorescence from E,E-2,6-bis(4-cyanostyryl)pyridine pristine crystals
Source: Royal Society of Chemistry journal article supplement (doi:10.1039/c9ra09576d), 2020-01-01
Supplement: c9ra09576d1.pdf [file c9ra09576d1.pdf]

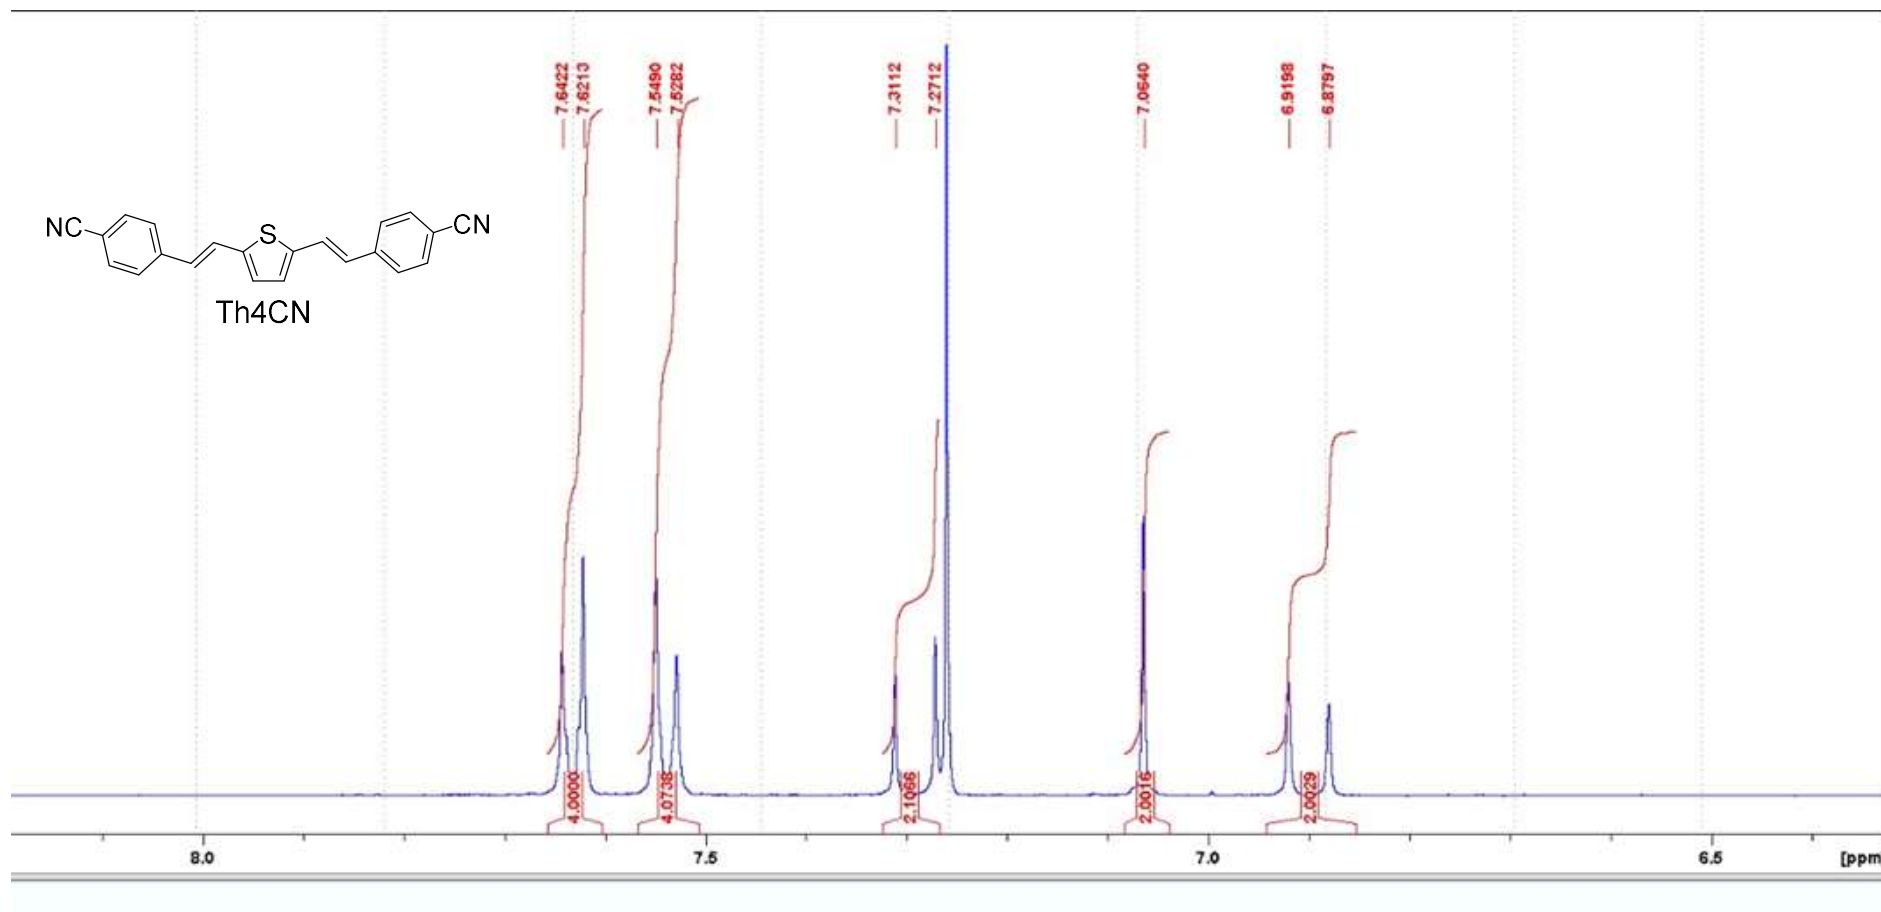

Figure S1. <sup>1</sup>H spectrum of Th4CN.

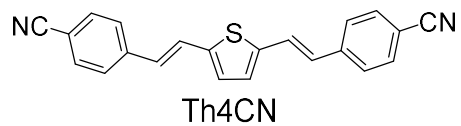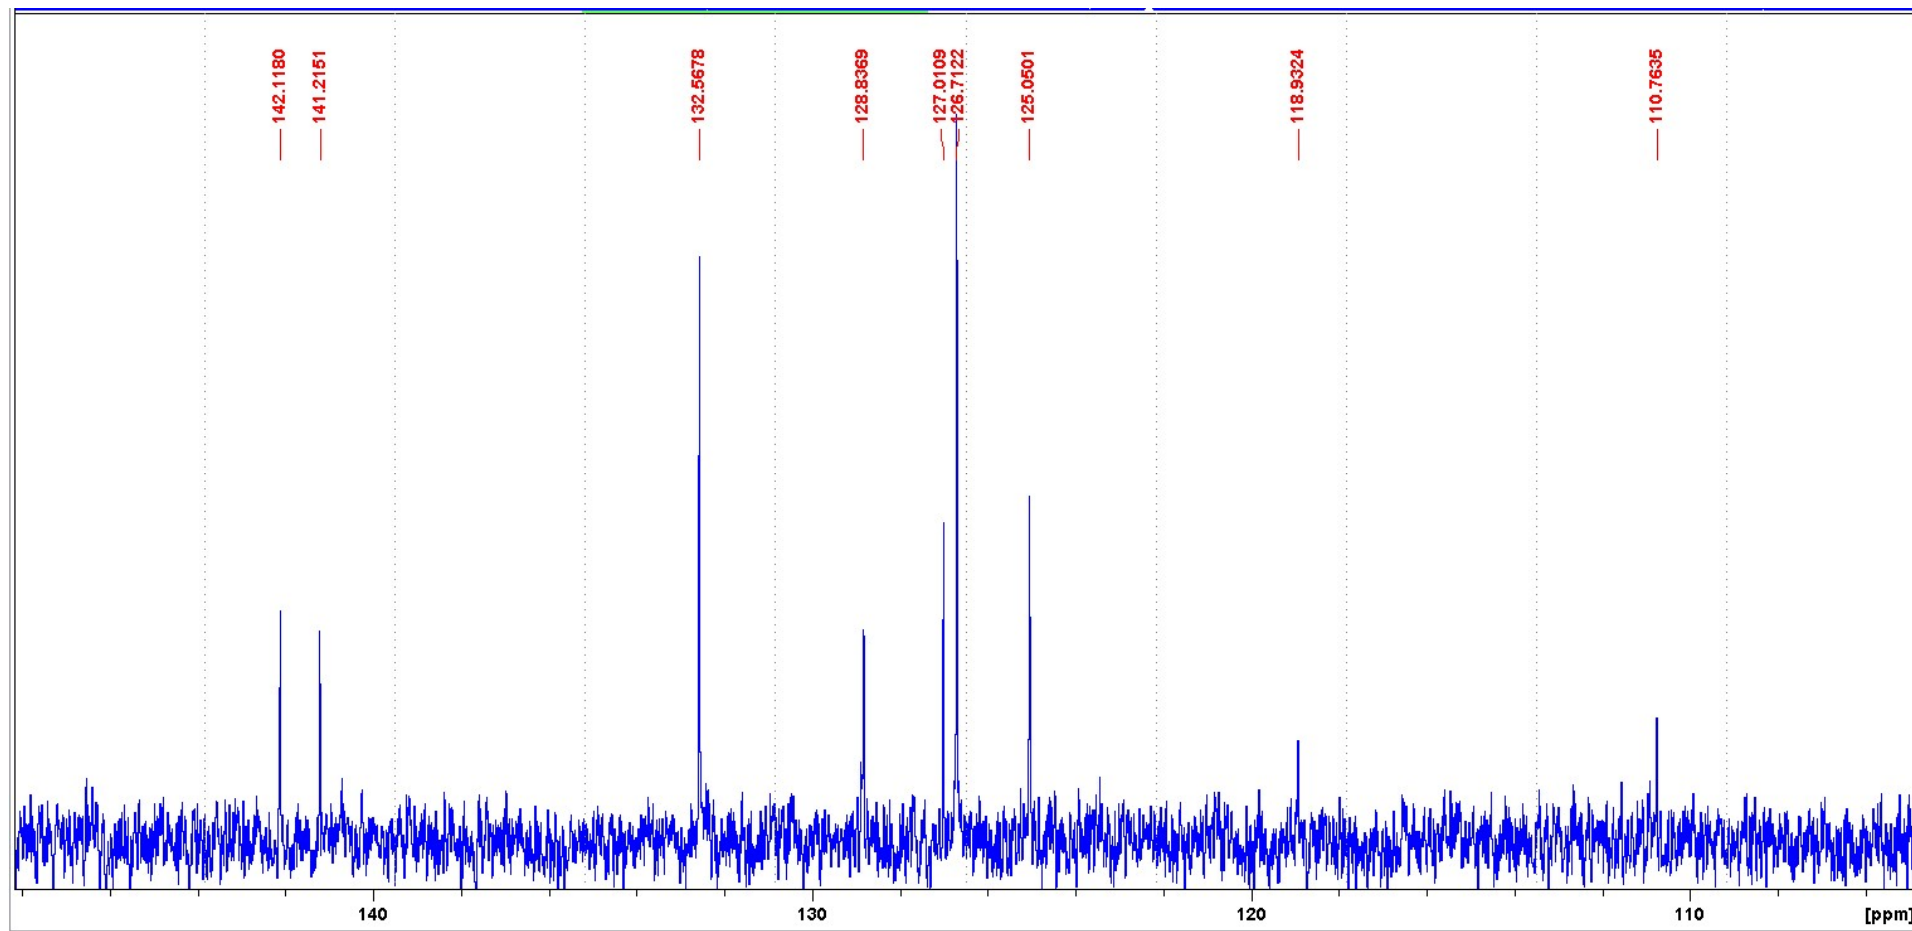

Figure S2.  $^{13}\text{C}$  spectrum of Th4CN.

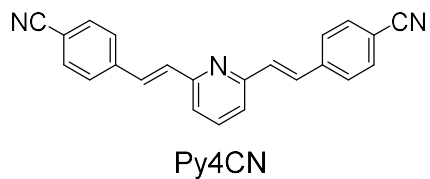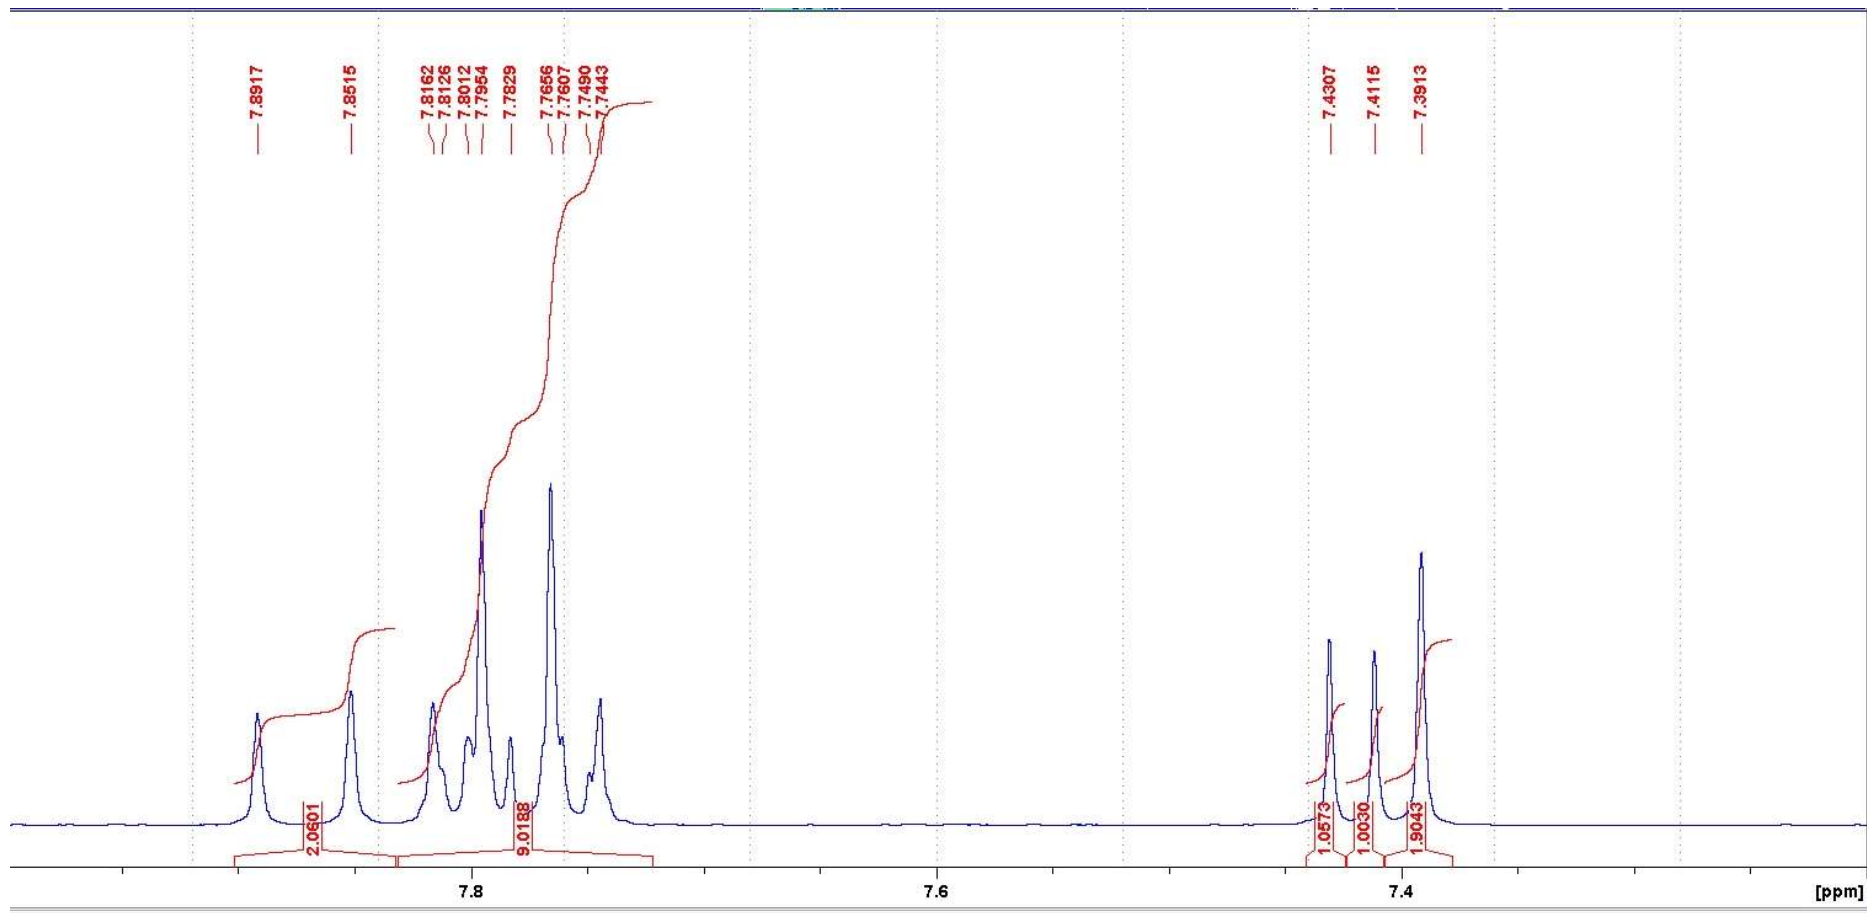

Figure S3. <sup>1</sup>H spectrum of Py4CN.

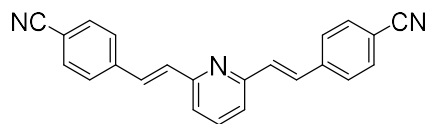

Py4CN

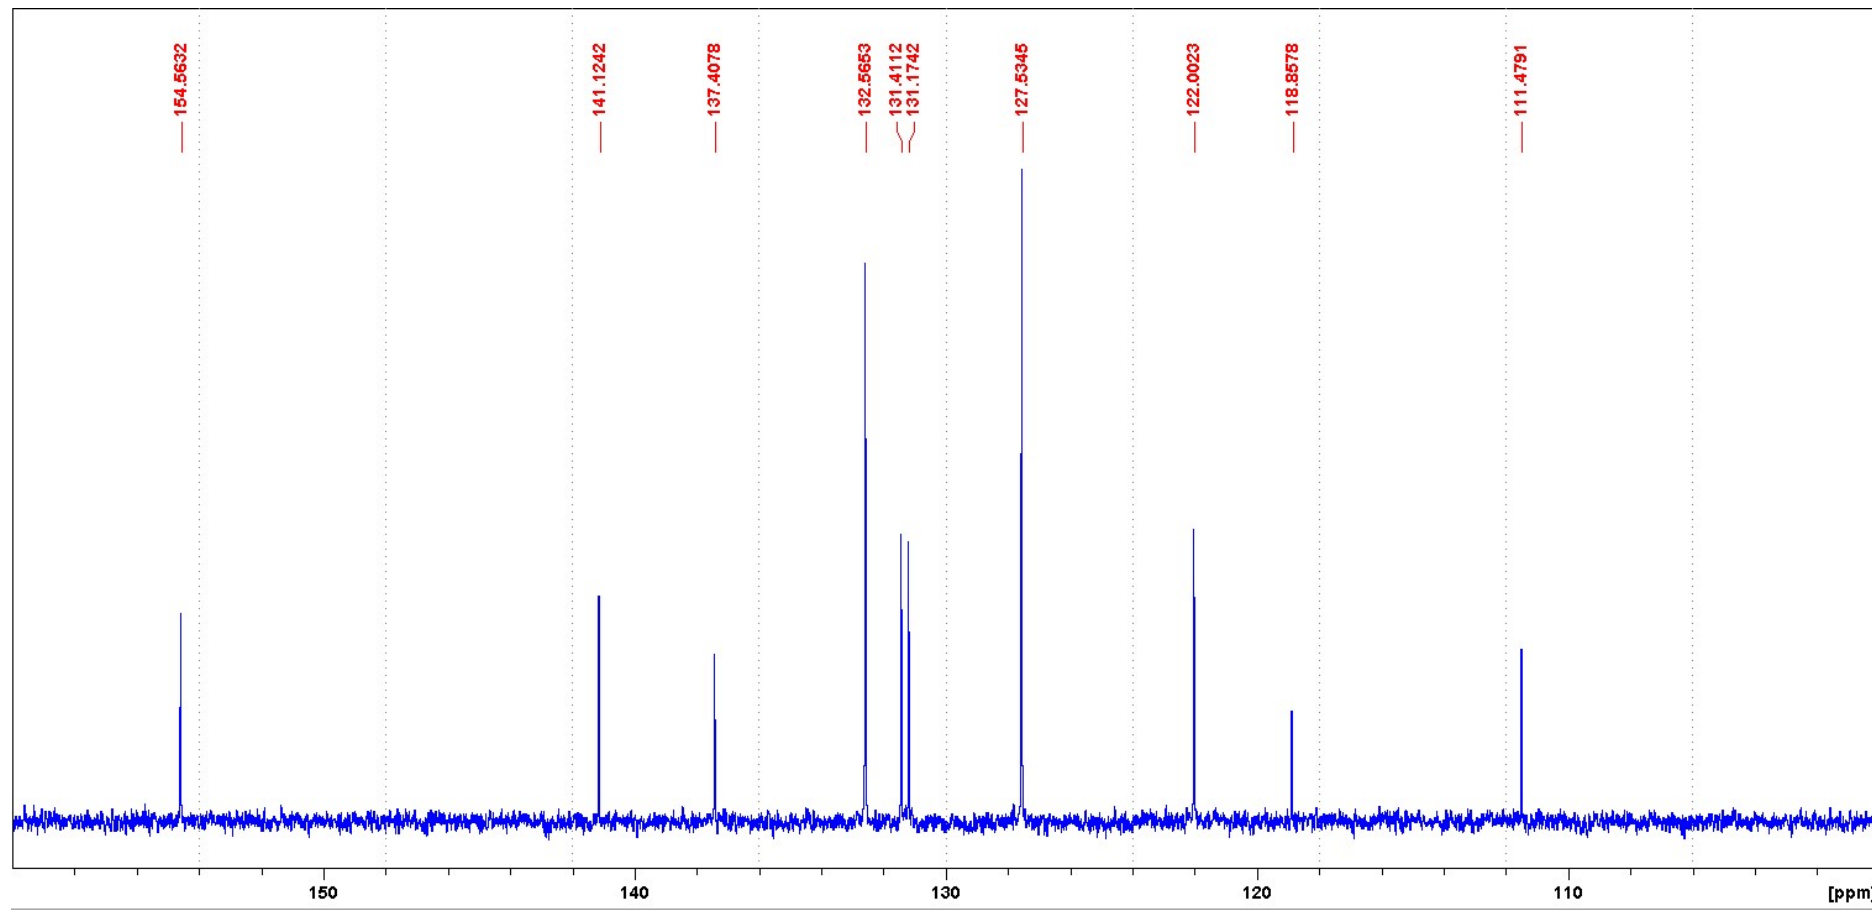

Figure S4.  $^{13}\text{C}$  spectrum of Py4CN.

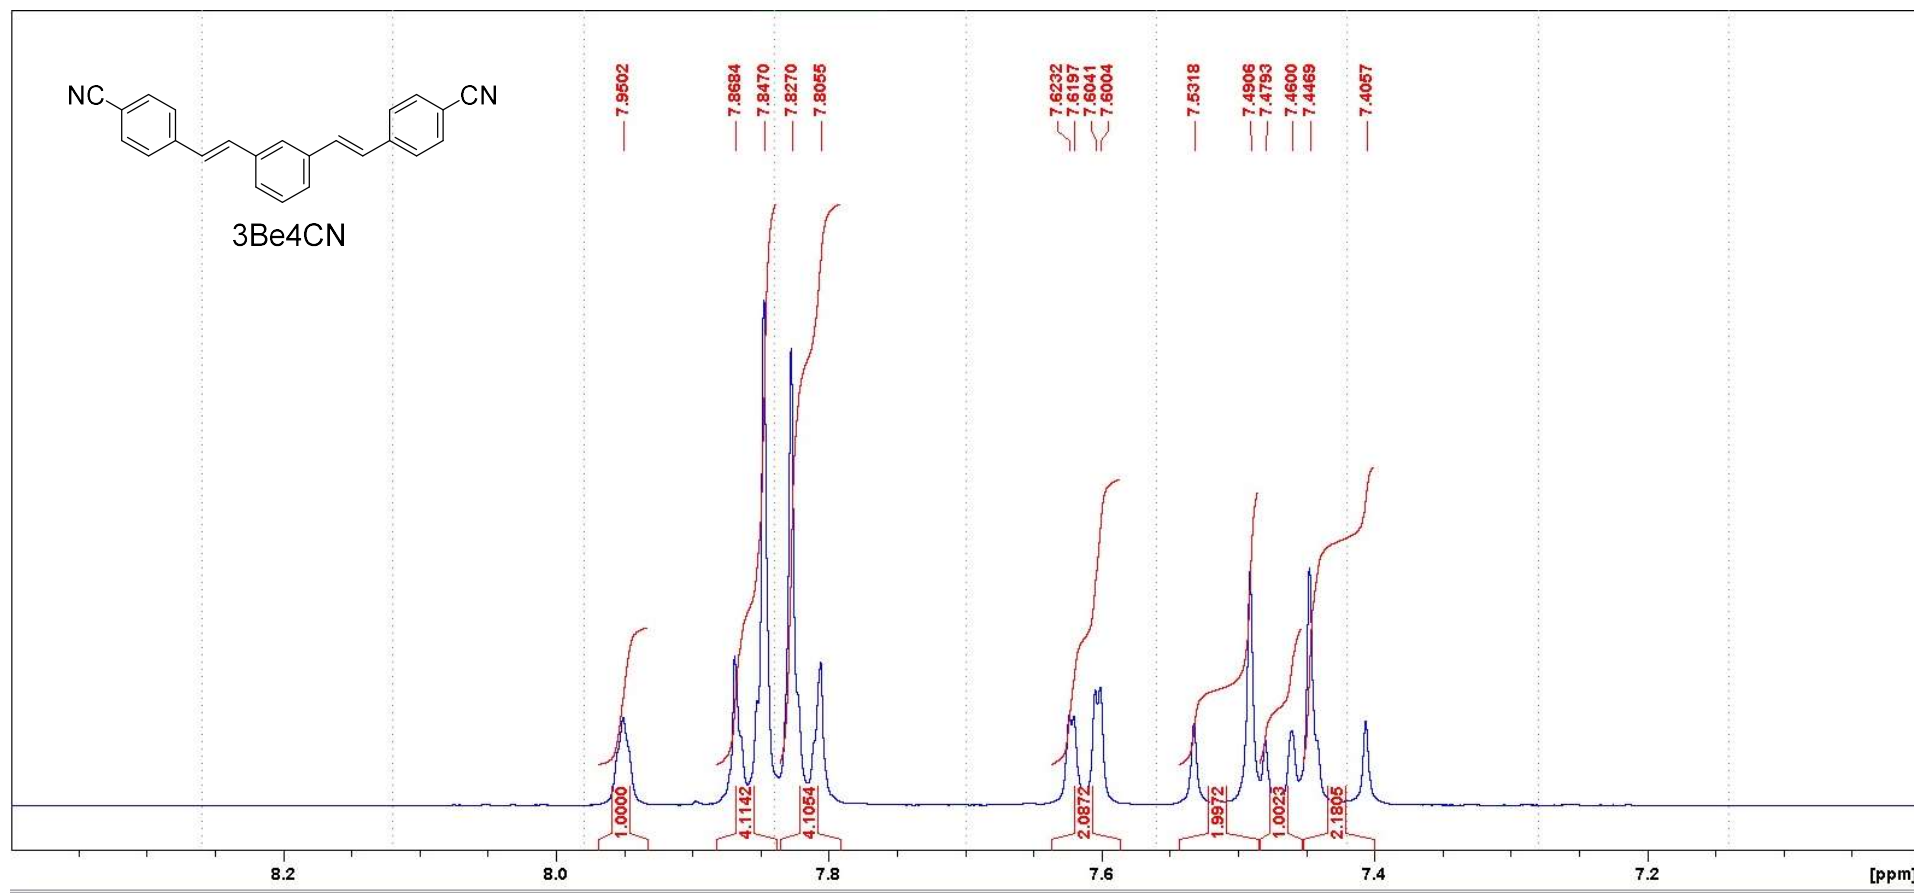

Figure S5.  $^1\text{H}$  spectrum of 3Be4CN.

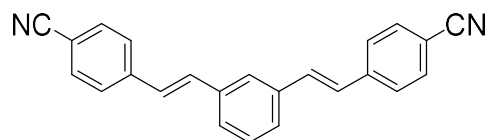

3Be4CN

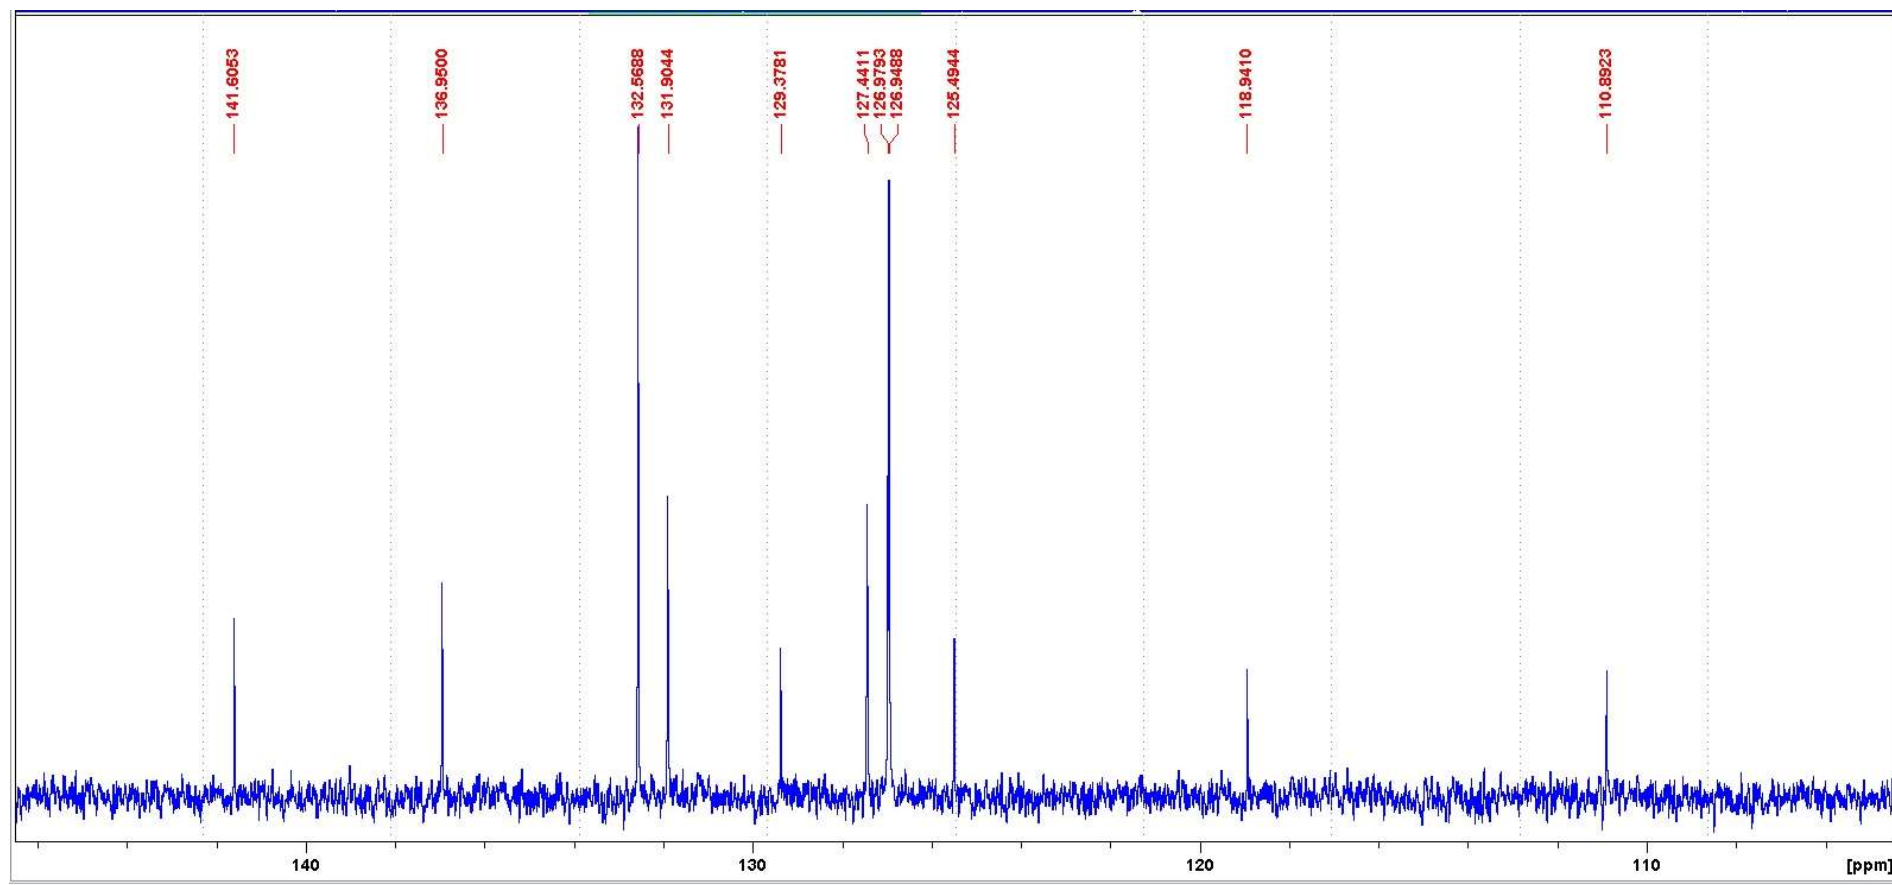

Figure S6.  $^{13}\text{C}$  spectrum of 3Be4CN.

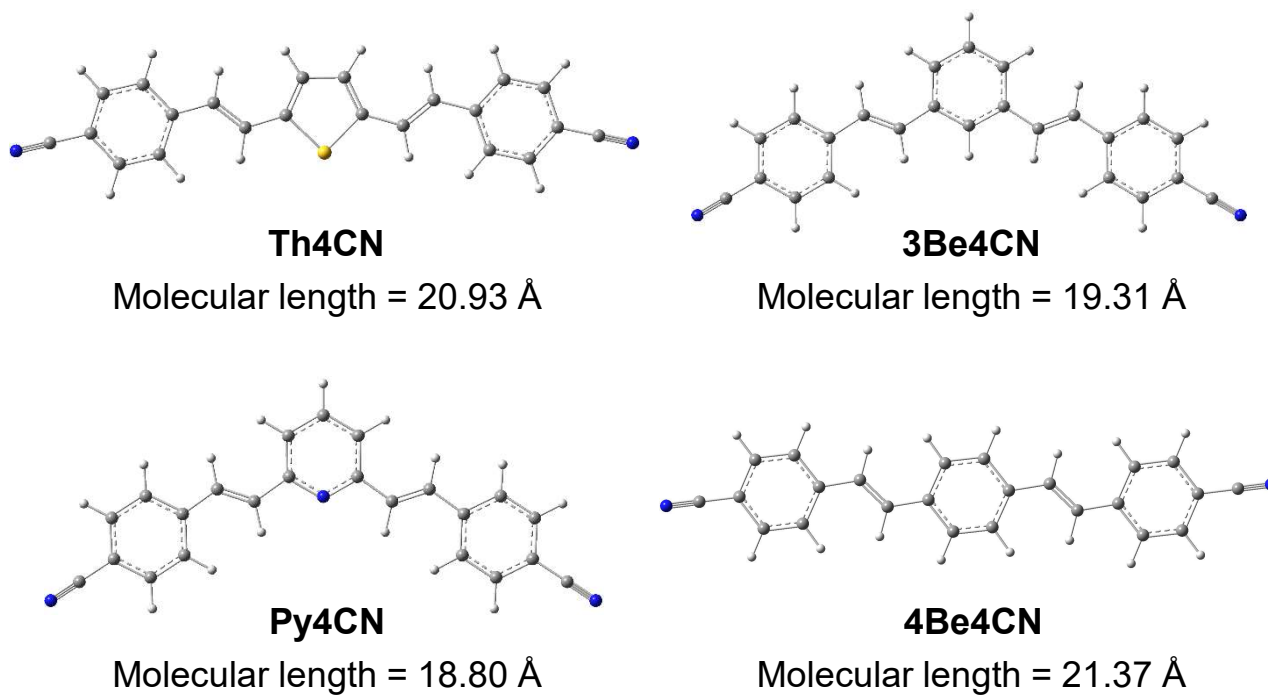

Figure S7. Optimized structures for 4 compounds.

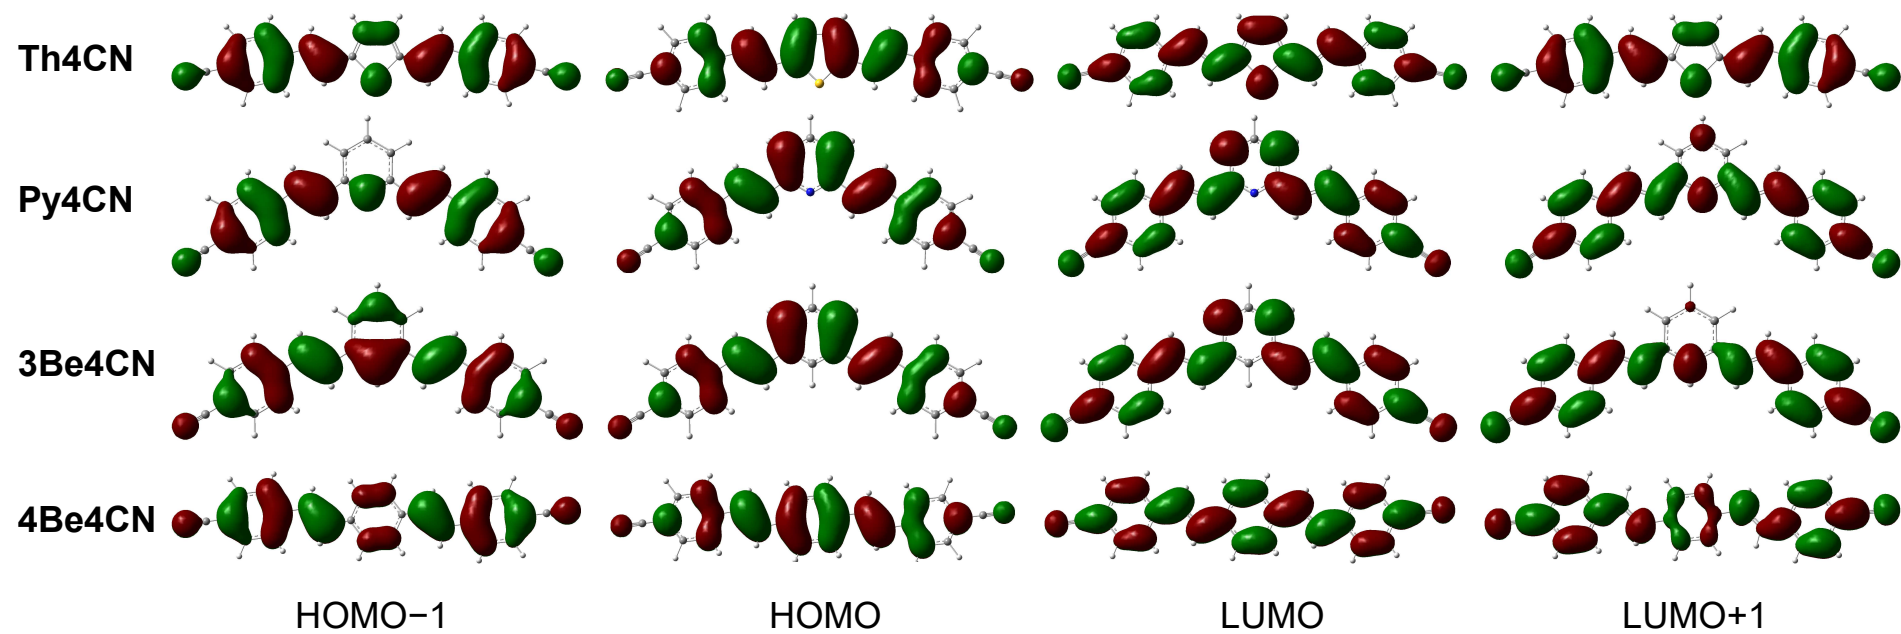

Figure S8. Localization of HOMO and LUMO orbit for 4 compounds.
